# Supplementary material for: Computational Identification of Clonal Neoantigens in IDH-Wildtype Glioblastoma Through Integrated Genomic Filtering and HLA Prediction
Source: Research Square preprint supplement (doi:10.21203/rs.3.rs-8351369/v1), 2025-12-30
Supplement: Supplementary file 1 [file 72fd6f19bcaa962161c40ca0.docx]

**Supplementary Figures**

**
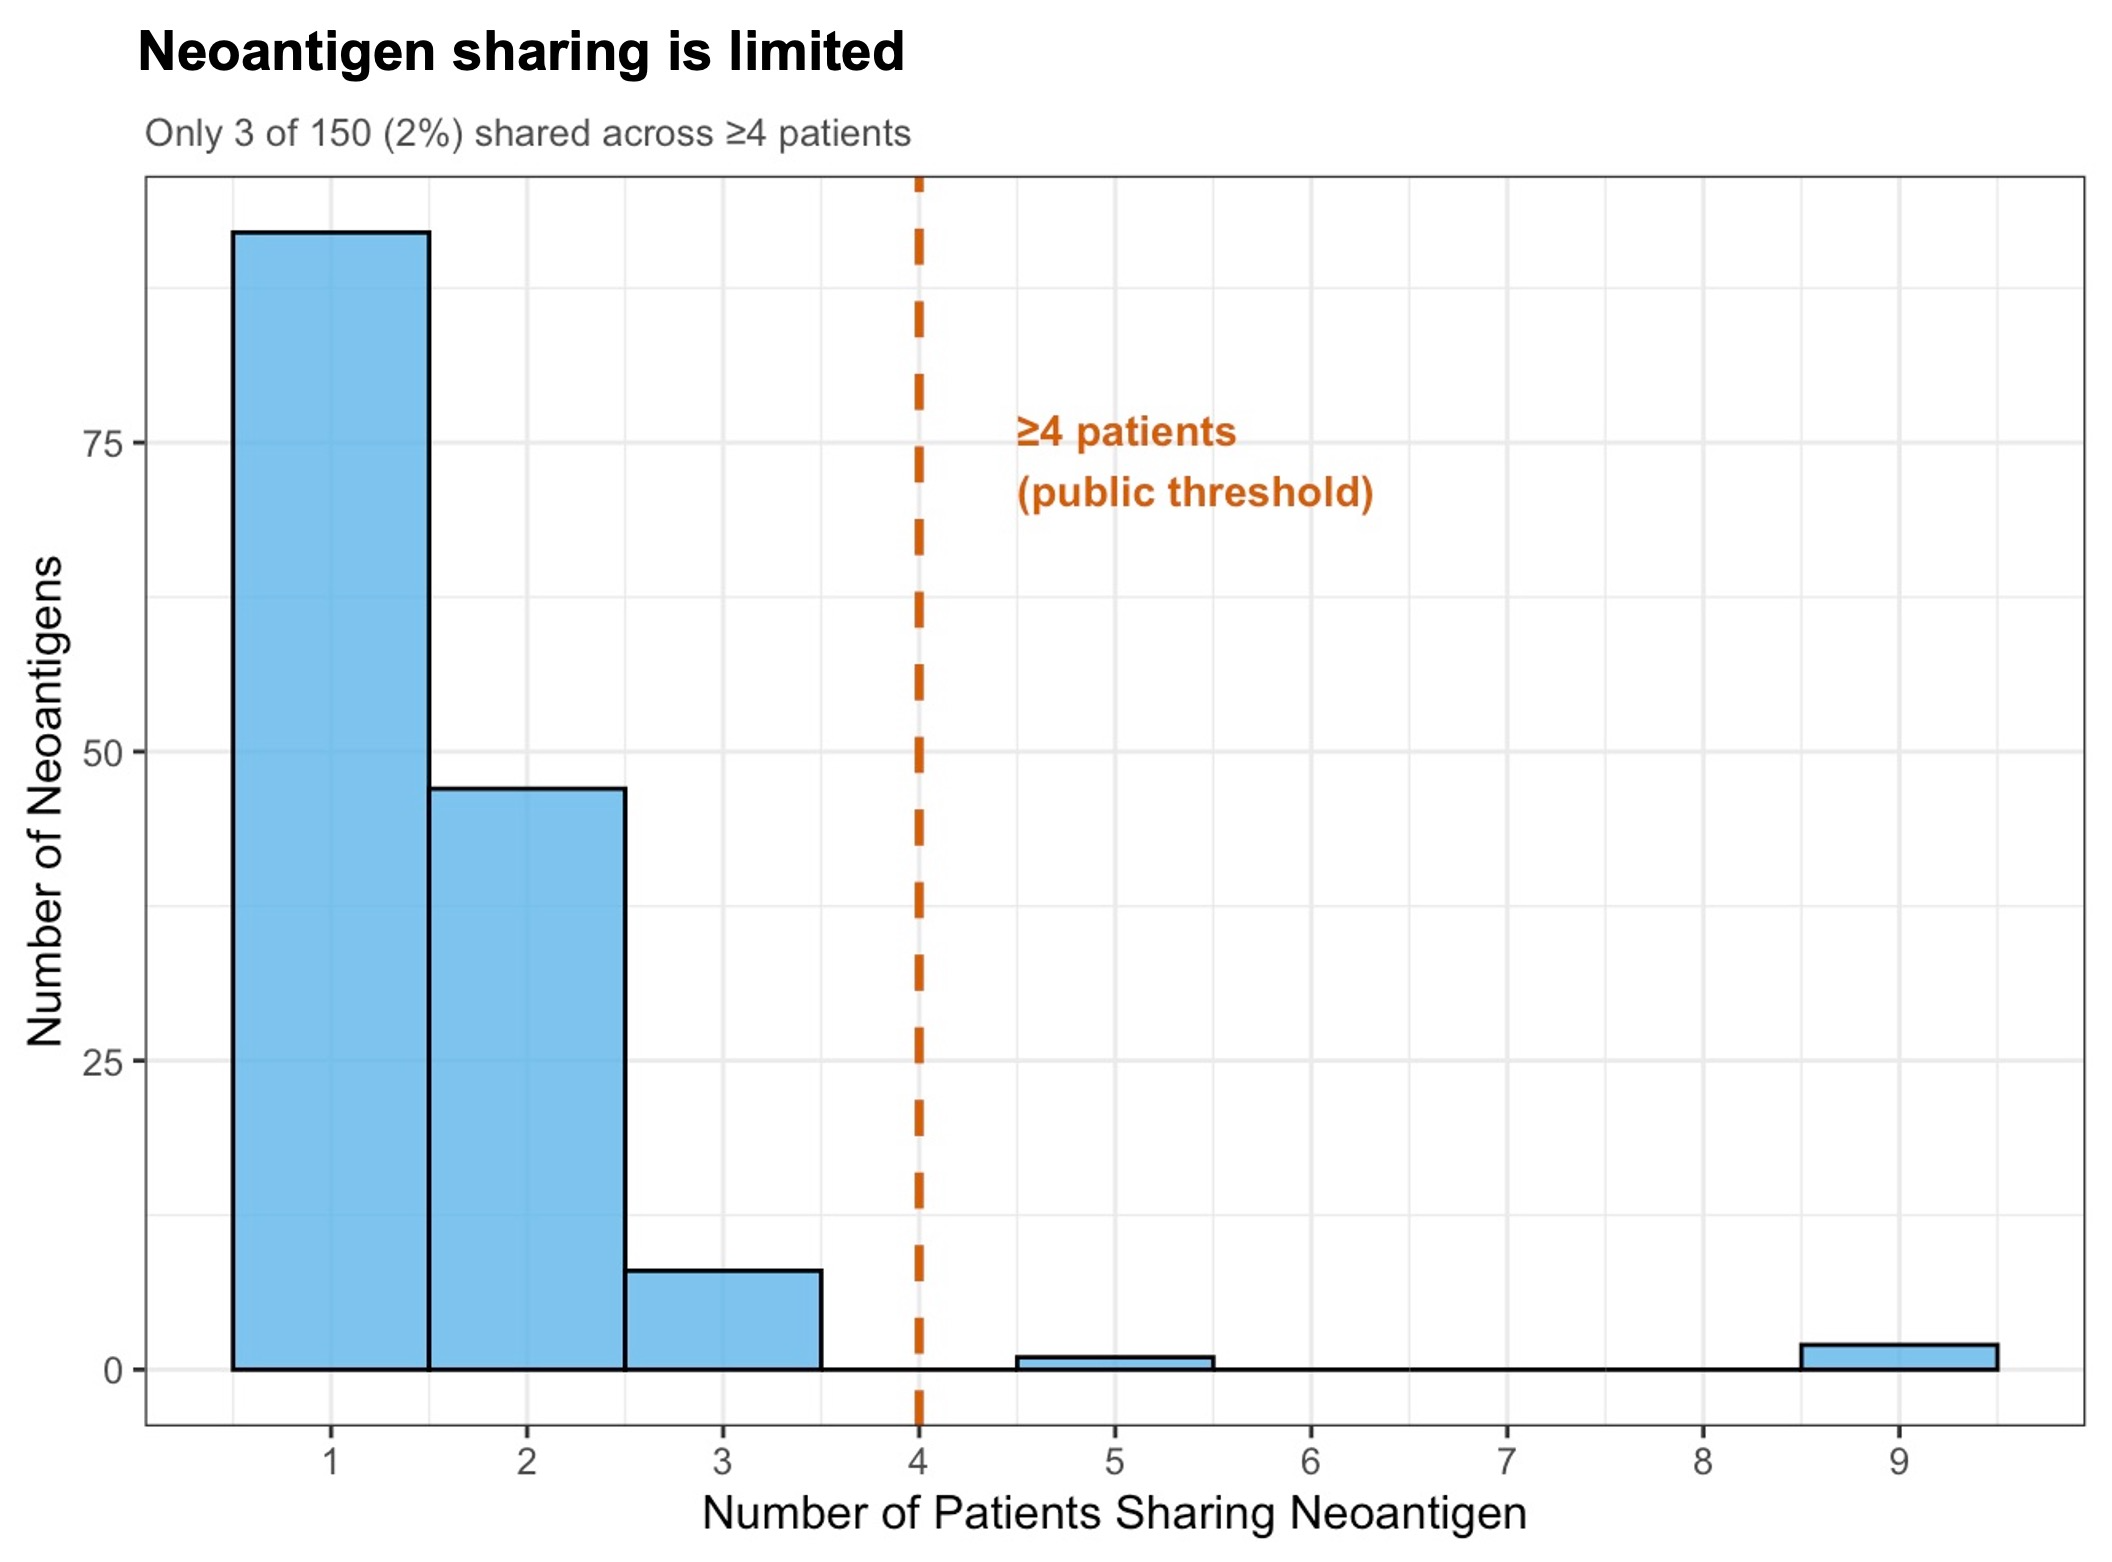
**

**Supplementary Figure 1. Neoantigen sharing is rare in IDH-wildtype GBM.**
Histogram showing the number of patients sharing each predicted strong neoantigen. Most neoantigens were unique to a single patient, with very few observed in multiple patients. Only **3 of 150 neoantigens (2%)** were shared across ≥4 patients (dashed line), indicating a predominantly private neoantigen landscape in GBM.


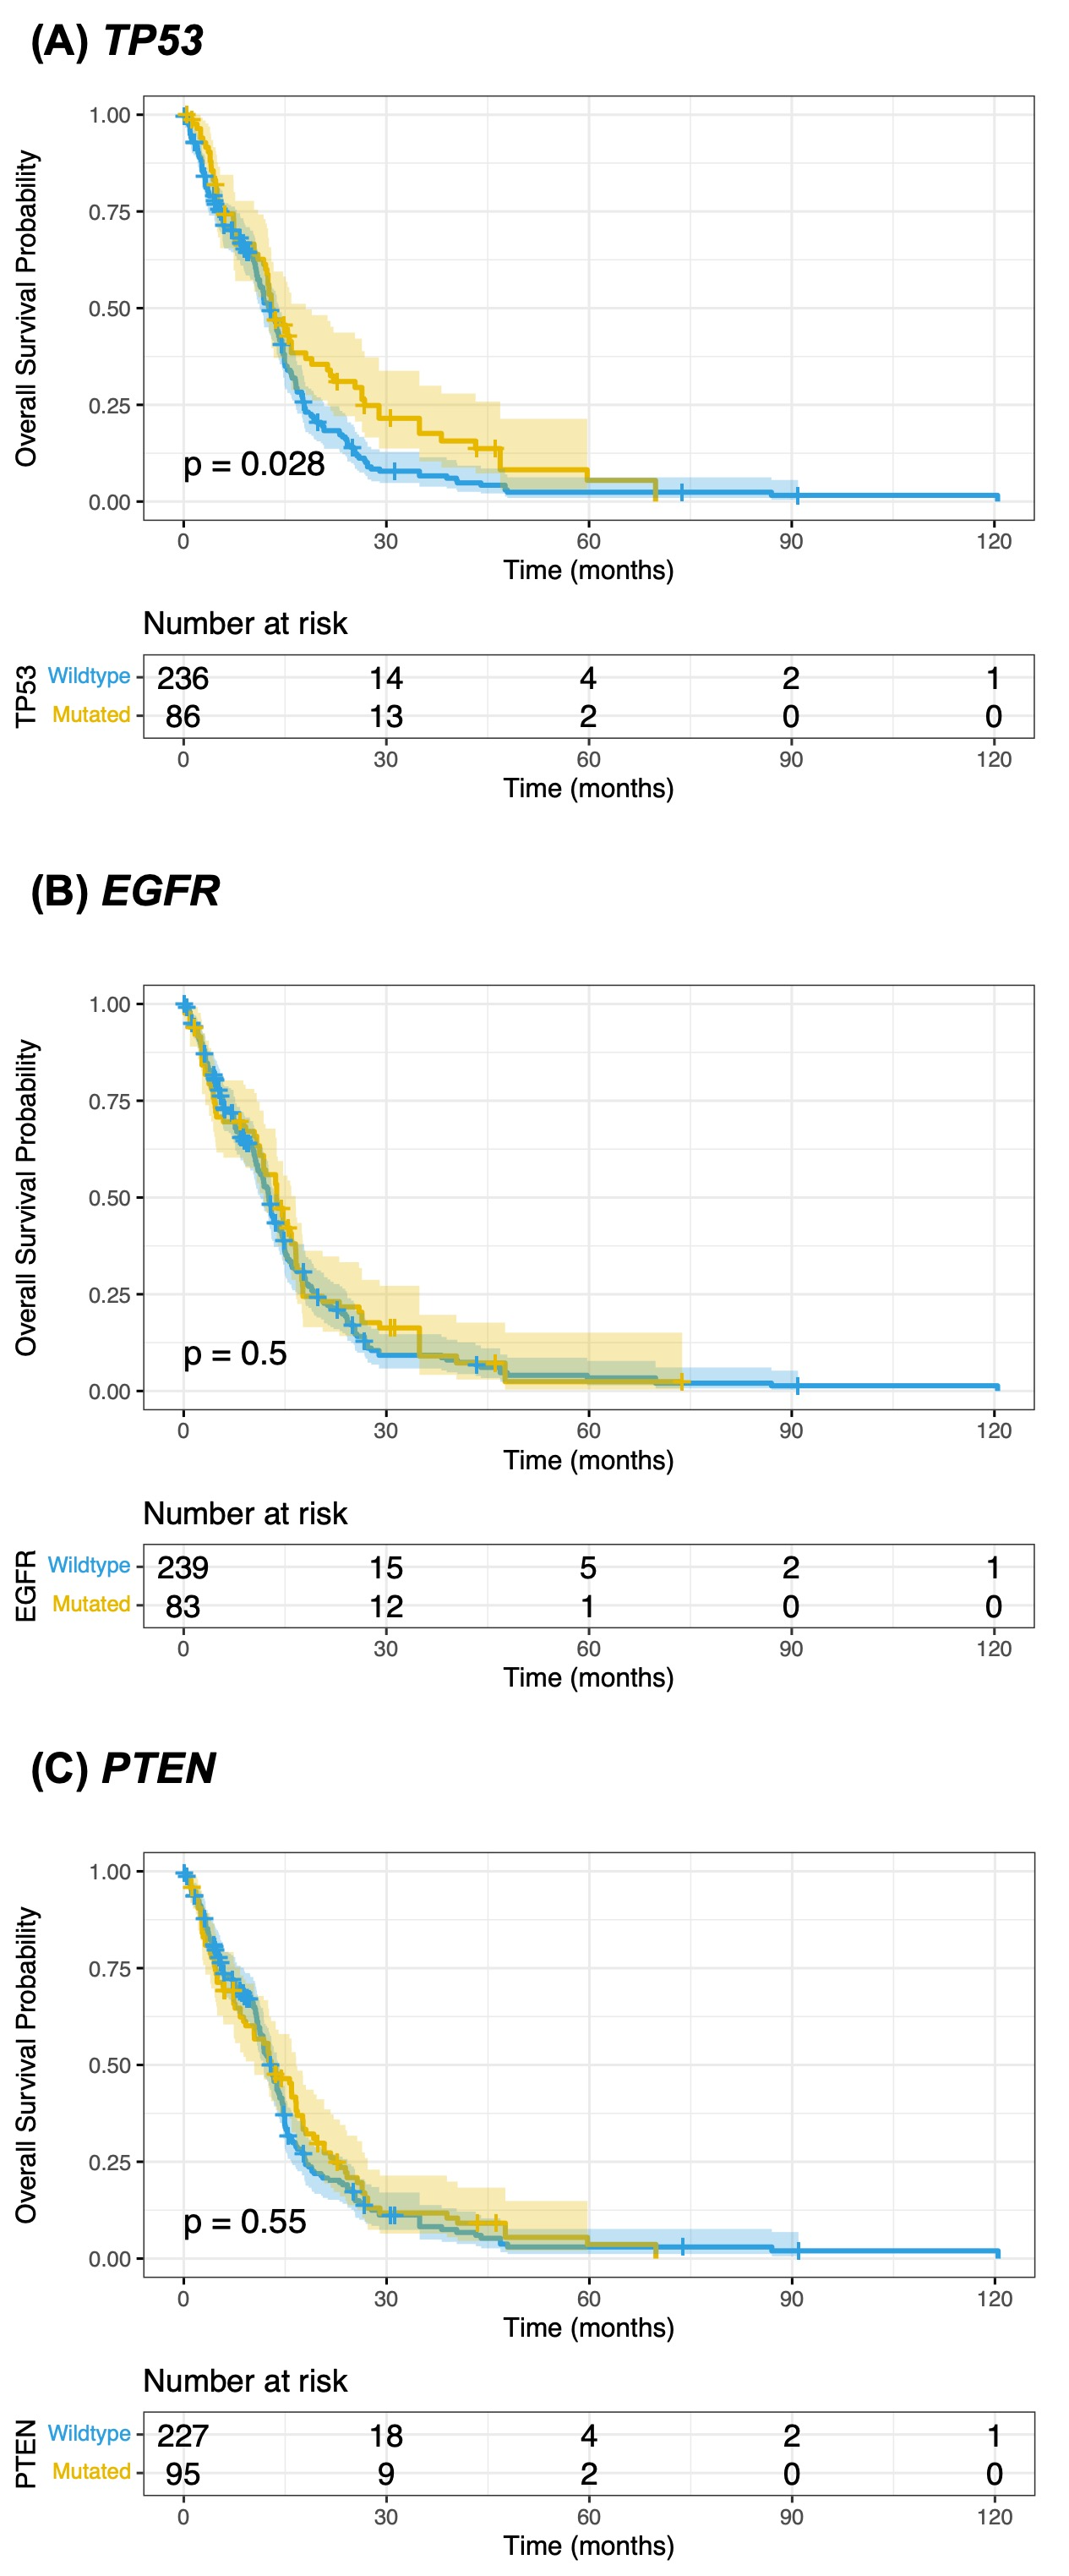


**Supplementary Figure S2.** Survival analysis stratified by driver gene mutation status in IDH-wildtype GBM. Kaplan-Meier survival curves for (A) *TP53*, (B) *EGFR*, and (C) *PTEN* mutation status in 322 IDH-wildtype GBM patients. Blue: wild type; yellow: mutant. Shaded areas represent 95% confidence intervals. Risk tables show patients at risk at each timepoint. P-values from log-rank tests are displayed.
